# Supplementary material
Source: MDPI journal article supplement (https://www.mdpi.com/2673-4141/4/1/4)
Supplement: s1 [file s1]

# Comprehensive thermodynamic study of alkyl-cyclohexanes as Liquid Organic Hydrogen Carriers motifs

Sergey P. Verevkin <sup>1,2,\*</sup>, Artemiy A. Samarov <sup>3</sup>, Sergey V. Vostrikov <sup>4</sup>, Peter Wasserscheid <sup>5,6</sup> and Karsten Müller

## List of symbols

|                              |                                                                                                                     |
|------------------------------|---------------------------------------------------------------------------------------------------------------------|
| $\Delta_l^g H_m^o$           | standard molar enthalpy of vaporization, $\text{kJ}\cdot\text{mol}^{-1}$                                            |
| $\Delta_l^g S_m^o$           | standard molar entropy of vaporization, $\text{kJ}\cdot\text{mol}^{-1}$                                             |
| $C_{p,m}^o$                  | standard molar heat capacity, $\text{J}\cdot\text{K}^{-1}\cdot\text{mol}^{-1}$                                      |
| $\Delta_l^g C_{p,m}^o$       | differences of the molar heat capacities at constant pressure, $\text{J}\cdot\text{K}^{-1}\cdot\text{mol}^{-1}$     |
| $p_i$                        | vapor pressure of a compound $i$ , Pa                                                                               |
| $p_{ref}$                    | reference vapor pressure, Pa                                                                                        |
| $\Delta_f H_m^o(\text{g})$   | standard molar enthalpy of formation in the gas phase, $\text{kJ}\cdot\text{mol}^{-1}$                              |
| $\Delta_f H_m^o(\text{liq})$ | standard molar enthalpy of formation in the liquid phase, $\text{kJ}\cdot\text{mol}^{-1}$                           |
| $\Delta_r H_m^o(\text{liq})$ | standard molar reaction enthalpy in the liquid phase, $\text{kJ}\cdot\text{mol}^{-1}$                               |
| $\Delta_r H_m^o/\text{H}_2$  | standard molar reaction enthalpy related to 1 mole $\text{H}_{2,\text{released}}$ , $\text{kJ}\cdot\text{mol}^{-1}$ |
| $J_x$                        | Kovats index                                                                                                        |
| $T_b$                        | normal boiling temperature, K                                                                                       |
| $\Delta_l^g H_m^o(J_x)$      | enthalpy of vaporisation derived from correlation with $J_x$ , $\text{kJ}\cdot\text{mol}^{-1}$                      |
| $\Delta_l^g H_m^o(T_b)$      | enthalpy of vaporisation derived from correlation with $T_b$ , $\text{kJ}\cdot\text{mol}^{-1}$                      |

**Table S1.** Group-additivity values for calculation of enthalpies of vaporisation,  $\Delta_l^g H_m^o$ , and enthalpies of formation,  $\Delta_f H_m^o(\text{g})$ , at 298.15 K (in  $\text{kJ mol}^{-1}$ ).

|                                 | $\Delta_l^g H_m^o$ | $\Delta_f H_m^o(\text{g})$ |
|---------------------------------|--------------------|----------------------------|
| CH <sub>3</sub> -(C)            | 5.65 <sup>a</sup>  | -42.05 <sup>b</sup>        |
| -(cyclohexane)                  | 29.75 <sup>c</sup> | -112.7 <sup>d</sup>        |
| -CH <sub>2</sub> -(cyclohexane) | 34.95 <sup>e</sup> | -129.7 <sup>f</sup>        |
| -(diMe-cyclohexane)-            | 31.4 <sup>g</sup>  | -121.5 <sup>h</sup>        |

<sup>a</sup> From Ref. [1]; <sup>b</sup> From Ref. [2]; <sup>c</sup> Derived as the difference in enthalpy of vaporisation of methyl-cyclohexane and CH<sub>3</sub>-(C). Experimental data are given in the main text.; <sup>d</sup> Derived as the difference in enthalpy of formation of ethyl-cyclohexane and CH<sub>3</sub>-(C). Experimental data are given in the main text.; <sup>e</sup> Derived as the difference in enthalpy of vaporisation of ethyl-cyclohexane and CH<sub>3</sub>-(C). Experimental data are given in the main text.; <sup>f</sup> Derived as the difference in enthalpy of formation of methyl-cyclohexane and CH<sub>3</sub>-(C). Experimental data are given in the main text.; <sup>g</sup> Derived as the difference in enthalpy of vaporisation of 1,2,3-tri-methyl-cyclohexane and two CH<sub>3</sub>-(C). Experimental data are given in the main text.; <sup>h</sup> Derived as the difference in enthalpy of formation of 1,2,3-tri-methyl-cyclohexane and two CH<sub>3</sub>-(C). Experimental data are given in the main text.

**Table S2.** Specific “transfer” contributions,  $\Delta_f H_m^o(\text{g})(\text{H}\rightarrow\text{R})$  derived from gas-phase enthalpies of formation of alkyl-substituted cyclohexanes, as well as  $\Delta_l^g H_m^o(\text{H}\rightarrow\text{R})$  derived from vaporization enthalpies of alkyl-substituted cyclohexanes, (at 298.15 K in  $\text{kJ}\cdot\text{mol}^{-1}$ )<sup>a</sup>

| R-cyclohexyl | $\Delta_f H_m^o(\text{g})$ | $\Delta_f H_m^o(\text{g})(\text{H}\rightarrow\text{R})$ <sup>b</sup> | $\Delta_l^g H_m^o$ [3] | $\Delta_l^g H_m^o(\text{H}\rightarrow\text{R})$ <sup>c</sup> |
|--------------|----------------------------|----------------------------------------------------------------------|------------------------|--------------------------------------------------------------|
| methyl-      | -154.7±1.0 [4]             | -31.3±1.3                                                            | 35.4±0.2               | 2.3±0.3                                                      |
| ethyl-       | -171.7±1.6 [4]             | -48.3±1.8                                                            | 40.6±0.2               | 7.5±0.3                                                      |
| iso-propyl-  | -194.9±2.0 <sup>d</sup>    | -70.6±2.2                                                            | 44.0±0.2               | 10.9±0.3                                                     |
| tert-butyl-  | -222.6±2.0 <sup>d</sup>    | -99.2±2.2                                                            | 47.0±0.2               | 13.9±0.3                                                     |

<sup>a</sup> Uncertainties are expanded uncertainties (0.95 level of confidence,  $k = 2$ ); <sup>b</sup> Calculated as the difference between the gas-phase enthalpies of formation of alkyl-cyclohexane and cyclohexane  $\Delta_f H_m^o(g) = -123.4 \pm 0.8 \text{ kJ} \cdot \text{mol}^{-1}$  [4]; <sup>c</sup> Calculated by G3MP2 and atomization reaction, and corrected according to Eq. (7); <sup>d</sup> Calculated as the difference between the vaporisation enthalpy of alkyl-cyclohexane and cyclohexane  $\Delta_1^g H_m^o = 33.1 \pm 0.2 \text{ kJ} \cdot \text{mol}^{-1}$  [3].

**Table S3.** Correlation of vaporisation enthalpies,  $\Delta_1^g H_m^o(298.15 \text{ K})$ , of alkyl-cyclohexanes with their Kovats indices ( $J_x$ )

| .compound                    | $J_x$ <sup>a</sup> | $\Delta_1^g H_m^o(\text{exp})$<br>kJ·mol <sup>-1</sup> | $\Delta_1^g H_m^o(J_x)$ <sup>b</sup><br>kJ·mol <sup>-1</sup> | $\Delta$ <sup>c</sup><br>kJ·mol <sup>-1</sup> |
|------------------------------|--------------------|--------------------------------------------------------|--------------------------------------------------------------|-----------------------------------------------|
| cyclohexane                  | 690                | 33.1±0.2 [3]                                           | 32.6                                                         | 0.5                                           |
| Me-cyclohexane               | 739                | 35.4±0.2 [3]                                           | 34.9                                                         | 0.5                                           |
| trans-1,2-di-Me-cyclohexane  | 817                | 38.4±0.2 [3]                                           | 38.7                                                         | -0.3                                          |
| cis-1,2-di-Me-cyclohexane    | 850                | 39.7±0.2 [3]                                           | 40.3                                                         | -0.6                                          |
| trans-1,3-di-Me-cyclohexane  | 823                | 39.2±0.2 [3]                                           | 39.0                                                         | 0.2                                           |
| cis-1,3-di-Me-cyclohexane    | 798                |                                                        | 37.8                                                         |                                               |
| trans-1,4-di-Me-cyclohexane  | 796                | 38.0±0.2 [3]                                           | 37.7                                                         | 0.3                                           |
| cis-1,4-di-Me-cyclohexane    | 820                | 39.1±0.2 [3]                                           | 38.9                                                         | 0.2                                           |
| trans-2-Me-Et-cyclohexane    | 930                |                                                        | 44.2                                                         |                                               |
| cis-2-Me-Et-cyclohexane      | 939                |                                                        | 44.6                                                         |                                               |
| trans-3-Me-Et-cyclohexane    | 926                |                                                        | 44.0                                                         |                                               |
| cis-3-Me-Et-cyclohexane      | 909                | 44.7±0.9 [Table S5]                                    | 43.2                                                         | 1.5                                           |
| trans-4-Me-Et-cyclohexane    | 914                |                                                        | 43.4                                                         |                                               |
| cis-4-Me-Et-cyclohexane      | 930                |                                                        | 44.2                                                         |                                               |
| Et-cyclohexane               | 842                | 40.6±0.2 [3]                                           | 39.9                                                         | 0.7                                           |
| 1,2-di-Et-cyclohexane        | 1040               |                                                        | 49.5                                                         |                                               |
| 1,3-di-Et-cyclohexane        | 1017               |                                                        | 48.4                                                         |                                               |
| 1,4-di-Et-cyclohexane        | 1060               |                                                        | 50.5                                                         |                                               |
| i-Bu-cyclohexane             | 1005               | 47.6±0.2 [3]                                           | 47.8                                                         | -0.2                                          |
| n-Pr-cyclohexane             | 944                | 45.1±0.2 [3]                                           | 44.9                                                         | 0.2                                           |
| 1,3,5-tri-Me-cyclohexane     | 870                | 43.5±1.5 [Table S5]                                    | 41.3                                                         | 2.2                                           |
| 1,2,3-tri-Me-cyclohexane     | 890                |                                                        | 42.3                                                         |                                               |
| 1,2,4,5-tetra-Me-cyclohexane | 1036               |                                                        | 49.3                                                         |                                               |
| penta-Me-cyclohexane         | 1072               |                                                        | 51.1                                                         |                                               |
| hexa-Me-cyclohexane          | 1192               |                                                        | 56.9                                                         |                                               |
| n-Bu-cyclohexane             | 1061               | 49.4±0.2 [3]                                           | 50.6                                                         | -1.2                                          |
| n-Pe-cyclohexane             | 1137               | 53.9±0.2 [3]                                           | 54.2                                                         | -0.3                                          |
| n-Hex-cyclohexane            | 1236               | 59.0±0.5 [5]                                           | 59.0                                                         | 0.0                                           |
| n-Hep-cyclohexane            | 1346               | 63.7±0.5 [5]                                           | 64.4                                                         | -0.7                                          |
| n-Oct-cyclohexane            | 1449               | 69.8±1.0 [6]                                           | 69.4                                                         | 0.4                                           |
| n-Dec-cyclohexane            | 1638               | 78.8±0.8 [5]                                           | 78.5                                                         | 0.3                                           |
| n-Dodec-cyclohexane          | 1822               | 88.9±0.8 [5]                                           | 87.5                                                         | 1.4                                           |
| n-tetra-Dec-cyclohexane      | 2079               | 99.4±1.0 [6]                                           | 99.9                                                         | -0.5                                          |
| iPr-cyclohexane              | 934                | 44.0±0.2 [3]                                           | 44.4                                                         | -0.4                                          |
| trans-3-Me-iPr-cyclohexane   | 1009               |                                                        | 48.0                                                         |                                               |
| cis-3-Me-iPr-cyclohexane     | 1037               |                                                        | 49.4                                                         |                                               |
| trans-4-Me-iPr-cyclohexane   | 1017               | 46.8±1.5 [Table S5]                                    | 48.4                                                         | -1.6                                          |
| t-Bu-cyclohexane             | 1005               | 47.0±0.2 [3]                                           | 47.8                                                         | -0.8                                          |

|                            |      |                     |      |      |
|----------------------------|------|---------------------|------|------|
| trans-4-Me-tBu-cyclohexane | 1081 |                     | 51.5 |      |
| cis-4-Me-tBu-cyclohexane   | 1093 |                     | 52.1 |      |
| 1,3-di-tBu-cyclohexane     | 1351 | 63.3±2.6 [Table S5] | 64.6 | -1.3 |

<sup>a</sup> Kovats indices ( $J_x$ ) are on the non-polar columns [7–9].; <sup>b</sup> Calculated using equation:  $\Delta_1^g H_m^o(298.15 \text{ K}) / (\text{kJ} \cdot \text{mol}^{-1}) = 0.0485 \times J_x - 0.9$  with ( $R^2 = 0.998$ ). Uncertainties are estimated to account  $\pm 1.5 \text{ kJ} \cdot \text{mol}^{-1}$ .; <sup>c</sup> Difference between column 3 and 4 in this table.

**Table S4.** Correlation of vaporisation enthalpies,  $\Delta_1^g H_m^o(298.15 \text{ K})$ , of alkyl-cyclohexanes with their normal boiling temperatures ( $T_b$ )

| Compound                     | $T_b$ <sup>a</sup><br>K | $\Delta_1^g H_m^o(\text{exp})$<br>kJ·mol <sup>-1</sup> | $\Delta_1^g H_m^o(T_b)$ <sup>b</sup><br>kJ·mol <sup>-1</sup> | $\Delta^c$<br>kJ·mol <sup>-1</sup> |
|------------------------------|-------------------------|--------------------------------------------------------|--------------------------------------------------------------|------------------------------------|
| Me-cyclohexane               | 374.0                   | 35.4±0.2 [3]                                           | 34.5                                                         | 0.9                                |
| trans-1,2-di-Me-cyclohexane  | 396.7                   | 38.4±0.2 [3]                                           | 38.8                                                         | -0.4                               |
| cis-1,2-di-Me-cyclohexane    | 403.0                   | 39.7±0.2 [3]                                           | 40.1                                                         | -0.4                               |
| trans-1,3-di-Me-cyclohexane  | 397.6                   | 39.2±0.2 [3]                                           | 39.0                                                         | 0.2                                |
| cis-1,3-di-Me-cyclohexane    | 393.3                   |                                                        | 38.2                                                         |                                    |
| trans-1,4-di-Me-cyclohexane  | 392.6                   | 38.0±0.2 [3]                                           | 38.1                                                         | -0.1                               |
| cis-1,4-di-Me-cyclohexane    | 397.5                   | 39.1±0.2 [3]                                           | 39.0                                                         | 0.1                                |
| trans-2-Me-Et-cyclohexane    | 424.8                   |                                                        | 44.3                                                         |                                    |
| cis-2-Me-Et-cyclohexane      | 428.1                   |                                                        | 44.9                                                         |                                    |
| trans-3-Me-Et-cyclohexane    | 421.7                   |                                                        | 43.7                                                         |                                    |
| cis-3-Me-Et-cyclohexane      | 420.7                   | 44.7±0.9 [Table S5]                                    | 43.5                                                         | 1.2                                |
| trans-4-Me-Et-cyclohexane    | 422.2                   |                                                        | 43.8                                                         |                                    |
| cis-4-Me-Et-cyclohexane      | 425.8                   |                                                        | 44.5                                                         |                                    |
| Et-cyclohexane               | 405.0                   | 40.6±0.2 [3]                                           | 40.4                                                         | 0.2                                |
| 1,2-di-Et-cyclohexane        | 449.8                   |                                                        | 49.1                                                         |                                    |
| 1,3-di-Et-cyclohexane        | 445.7                   |                                                        | 48.3                                                         |                                    |
| 1,4-di-Et-cyclohexane        | 458.7                   |                                                        | 50.8                                                         |                                    |
| i-Bu-cyclohexane             | 444.4                   | 47.6±0.2 [3]                                           | 48.0                                                         | -0.4                               |
| n-Pr-cyclohexane             | 429.8                   | 45.1±0.2 [3]                                           | 45.2                                                         | -0.1                               |
| 1,3,5-tri-Me-cyclohexane     | 413.7                   | 43.5±1.5 [Table S5]                                    | 42.1                                                         | 1.4                                |
| 1,2,4,5-tetra-Me-cyclohexane | 446.2                   |                                                        | 48.4                                                         |                                    |
| n-Bu-cyclohexane             | 454.1                   | 49.4±0.2 [3]                                           | 49.9                                                         | -0.5                               |
| n-Pe-cyclohexane             | 477.0                   | 53.9±0.2 [3]                                           | 54.3                                                         | -0.4                               |
| n-Hex-cyclohexane            | 497.9                   | 59.0±0.5 [5]                                           | 58.3                                                         | 0.7                                |
| n-Hep-cyclohexane            | 518.6                   | 63.7±0.5 [5]                                           | 62.3                                                         | -1.4                               |
| iPr-cyclohexane              | 428.2                   | 44.0±0.2 [3]                                           | 44.9                                                         | -0.9                               |
| trans-2-Me-iPr-cyclohexane   | 444.0                   |                                                        | 48.0                                                         |                                    |
| cis-2-Me-iPr-cyclohexane     | 444.0                   |                                                        | 48.0                                                         |                                    |
| trans-3-Me-iPr-cyclohexane   | 4410.                   |                                                        | 47.4                                                         |                                    |
| cis-3-Me-iPr-cyclohexane     | 442.0                   |                                                        | 47.6                                                         |                                    |
| trans-4-Me-iPr-cyclohexane   | 443.8                   | 46.8±1.5 [Table S5]                                    | 47.9                                                         | -1.1                               |
| cis-4-Me-iPr-cyclohexane     | 445.9                   |                                                        | 48.3                                                         |                                    |
| 1,2-di-iPr-cyclohexane       | 480.0                   |                                                        | 54.9                                                         |                                    |
| 1,3-di-iPr-cyclohexane       | 480.0                   |                                                        | 54.9                                                         |                                    |
| 1,4-di-iPr-cyclohexane       | 479.8                   |                                                        | 54.9                                                         |                                    |
| 1,3,5-tri-iPr-cyclohexane    | 528.9                   |                                                        | 64.3                                                         |                                    |
| 1,2,4-tri-iPr-cyclohexane    | 528.7                   |                                                        | 64.3                                                         |                                    |

|                                |       |                     |      |      |
|--------------------------------|-------|---------------------|------|------|
| 1,2,3-tri-iPr-cyclohexane      | 523.5 |                     | 63.3 |      |
| 1,2,4,5-tetra-iPr-cyclohexane  | 573.0 |                     | 72.8 |      |
| t-Bu-cyclohexane               | 444.7 | 47.0±0.2 [3]        | 48.1 | -1.1 |
| 2-Me-tBu-cyclohexane           | 457.0 |                     | 50.5 |      |
| 3-Me-t-Bu-cyclohexane          | 457.0 |                     | 50.5 |      |
| trans-4-Me-tBu-cyclohexane     | 459.7 |                     | 51.0 |      |
| cis-4-Me-tBu-cyclohexane       | 462.0 |                     | 51.4 |      |
| 3,5-dimethyl-4-tBu-cyclohexane | 472.6 |                     | 53.5 |      |
| 1,2-di-tBu-cyclohexane         | 508.7 |                     | 60.4 |      |
| 1,3-di-tBu-cyclohexane         | 518.0 | 63.3±2.6 [Table S5] | 62.2 | 1.1  |
| trans-1,4-di-tBu-cyclohexane   | 513.0 |                     | 61.3 |      |
| cis-1,4-di-tBu-cyclohexane     | 516.0 |                     | 61.8 |      |
| 3,5-di-tBu-4-Me-cyclohexane    | 529.6 |                     | 64.5 |      |
| 1,3,5-tri-tBu-cyclohexane      | 568.0 |                     | 71.9 |      |
| dicyclohexyl-methane           | 526.0 | 64.5±3.5 [Table S5] | 63.8 |      |

<sup>a</sup> Normal boiling temperatures,  $T_b$ , [10,11].; <sup>b</sup> Calculated using equation:  $\Delta_1^g H_m^o(298.15 \text{ K}) / (\text{kJ} \cdot \text{mol}^{-1}) = 0.1927 \times T_b - 37.6$  with ( $R^2 = 0.989$ ). Uncertainties are estimated to account  $\pm 1.5 \text{ kJ} \cdot \text{mol}^{-1}$ .; <sup>c</sup> Difference between column 3 and 4 in this table.

**Table S5.** Compilation of enthalpies of vaporisation  $\Delta_1^g H_m^o$  for alkyl-cyclohexanes derived in this work from the data available in the literature.

| Compound                      | M <sup>a</sup> | T- range<br>K | $\Delta_1^g H_m^o(T_{av})$<br>kJ·mol <sup>-1</sup> | $\Delta_1^g H_m^o(298.15 \text{ K})^b$<br>kJ·mol <sup>-1</sup> | Ref.     |
|-------------------------------|----------------|---------------|----------------------------------------------------|----------------------------------------------------------------|----------|
| 1,3,5-tri-Me-cyclohexane      | n/a            | 318-410       | 38.2±0.2                                           | 43.5±1.5                                                       | [12]     |
| 3-Me-ethyl-cyclohexane        | E              | 348.3-367.6   | 40.3±0.1                                           | 44.7±0.9                                                       | [13]     |
| 4-Me-iso-propyl-cyclohexane   | n/a            | 282-443       | 41.6±0.2                                           | 46.8±1.5                                                       | [12]     |
| 1,3-di-tert-butyl-cyclohexane | BP             | 343.2-508.9   | 50.2±0.2                                           | 63.3±2.6                                                       | Table S6 |
| dicyclohexyl-methane          | BP             | 396-525.8     | 49.0±1.6                                           | 64.5±3.5                                                       | Table S6 |

<sup>a</sup> Methods: n/a = not available; E = Ebulliometry; BP = derived from boiling points at different temperatures available in the literature (see Table S6).; <sup>b</sup> Vapor pressures available in the literature were treated using heat capacity differences from Table S9 to evaluate the enthalpy of vaporisation at 298.15 K. Uncertainty of the vaporisation enthalpy  $U(\Delta_1^g H_m^o)$  is the expanded uncertainty (0.95 level of confidence).

**Table S6.** Vapor pressures,  $p_i$ , at different temperatures compiled from the literature [10], standard molar vaporisation enthalpies,  $\Delta_1^g H_m^o$ , and standard molar vaporisation entropies,  $\Delta_1^g S_m^o$

| T/<br>K                                                                                                                    | $p_i$ /<br>Pa | $\Delta_1^g H_m^o(T)^a$<br>kJ·mol <sup>-1</sup> | $\Delta_1^g S_m^o(T)^b$<br>J·K <sup>-1</sup> ·mol <sup>-1</sup> |
|----------------------------------------------------------------------------------------------------------------------------|---------------|-------------------------------------------------|-----------------------------------------------------------------|
| 1,3-di-tert-butyl-cyclohexane: $\Delta_1^g H_m^o(298.15 \text{ K}) = (63.3 \pm 2.6) \text{ kJ} \cdot \text{mol}^{-1}$      |               |                                                 |                                                                 |
| $\ln(p/p_{ref}) = \frac{343.5}{R} - \frac{196108.8}{RT} - \frac{110.0}{R} \ln \frac{T}{298.15}$ ; $p_{ref} = 1 \text{ Pa}$ |               |                                                 |                                                                 |
| 508.9                                                                                                                      | 101325        | 40.1                                            | 79.0                                                            |
| 395.2                                                                                                                      | 4200          | 52.6                                            | 106.9                                                           |
| 343.2                                                                                                                      | 320           | 58.4                                            | 122.3                                                           |
| dicyclohexyl-methane: $\Delta_1^g H_m^o(298.15 \text{ K}) = (64.5 \pm 3.5) \text{ kJ} \cdot \text{mol}^{-1}$               |               |                                                 |                                                                 |
| $\ln(p/p_{ref}) = \frac{329.0}{R} - \frac{93339.8}{RT} - \frac{96.9}{R} \ln \frac{T}{298.15}$ ; $p_{ref} = 1 \text{ Pa}$   |               |                                                 |                                                                 |
| 396.0                                                                                                                      | 2400          | 55.0                                            | 107.8                                                           |
| 414.0                                                                                                                      | 6399          | 53.2                                            | 105.7                                                           |
| 518.0                                                                                                                      | 100658        | 43.1                                            | 83.3                                                            |

|       |        |      |      |
|-------|--------|------|------|
| 518.0 | 97992  | 43.1 | 83.1 |
| 518.0 | 100658 | 43.1 | 83.3 |
| 521.0 | 99992  | 42.9 | 82.3 |
| 521.0 | 100658 | 42.9 | 82.3 |
| 521.0 | 97992  | 42.9 | 82.1 |
| 521.0 | 100658 | 42.9 | 82.3 |
| 523.0 | 101725 | 42.7 | 81.7 |
| 523.0 | 99992  | 42.7 | 81.6 |
| 525.0 | 101725 | 42.5 | 81.0 |
| 525.8 | 101325 | 42.4 | 80.7 |

<sup>a</sup> Uncertainties of the vaporisation enthalpies are expressed as the expanded uncertainty (0.95 level of confidence,  $k = 2$ ). They include uncertainties from the fitting equation and uncertainties from temperature adjustment to  $T = 298.15$  K. Uncertainties in the temperature adjustment of vaporisation enthalpies to the reference temperature  $T = 298.15$  K are estimated to account with 20% to the total adjustment.

**Table S7.** Correlation of vaporisation enthalpies,  $\Delta_f^g H_m^o(298.15 \text{ K})$ , of alkyl-cyclohexanes with the number of carbon atoms

| Compound                    | $\Delta_f^g H_m^o(\text{exp})$ | $\Delta_f^g H_m^o(\text{calc})^a$ | $\Delta$<br>(exp-calc) | $\Delta_f^g H_m^o(\text{calc})^b$ | $\Delta$<br>(exp-calc) |
|-----------------------------|--------------------------------|-----------------------------------|------------------------|-----------------------------------|------------------------|
| Me-cyclohexane              | 35.4±0.2 [3]                   | 35.8                              | -0.4                   | 34.9                              | 0.5                    |
| trans-1,2-di-Me-cyclohexane | 38.4±0.2 [3]                   | 40.5                              | -2.1                   | 38.4                              | 0.0                    |
| cis-1,2-di-Me-cyclohexane   | 39.7±0.2 [3]                   | 40.5                              | -0.8                   | 38.4                              | 1.3                    |
| trans-1,3-di-Me-cyclohexane | 39.2±0.2 [3]                   | 40.5                              | -1.3                   | 38.4                              | 0.8                    |
| cis-1,3-di-Me-cyclohexane   | 38.0±1.1 <sup>c</sup>          | 40.5                              | -2.5                   | 38.4                              | -0.4                   |
| trans-1,4-di-Me-cyclohexane | 38.0±0.2 [3]                   | 40.5                              | -2.5                   | 38.4                              | -0.4                   |
| cis-1,4-di-Me-cyclohexane   | 39.1±0.2 [3]                   | 40.5                              | -1.4                   | 38.4                              | 0.7                    |
| trans-2-Me-Et-cyclohexane   | 44.3±1.1 <sup>c</sup>          | 45.2                              | -0.9                   | 43.6                              | 0.7                    |
| cis-2-Me-Et-cyclohexane     | 44.8±1.1 <sup>c</sup>          | 45.2                              | -0.4                   | 43.6                              | 1.2                    |
| trans-3-Me-Et-cyclohexane   | 43.9±1.1 <sup>c</sup>          | 45.2                              | -1.3                   | 43.6                              | 0.3                    |
| cis-3-Me-Et-cyclohexane     | 44.7±0.9 [Table S5]            | 45.2                              | -0.5                   | 43.6                              | 1.1                    |
| trans-4-Me-Et-cyclohexane   | 43.6±1.1 <sup>c</sup>          | 45.2                              | -1.6                   | 43.6                              | 0.0                    |
| cis-4-Me-Et-cyclohexane     | 44.4±1.1 <sup>c</sup>          | 45.2                              | -0.8                   | 43.6                              | 0.8                    |
| Et-cyclohexane              | 40.6±0.2 [3]                   | 40.5                              | 0.1                    | 40.1                              | 0.5                    |
| 1,2-di-Et-cyclohexane       | 49.3±1.1 <sup>c</sup>          | 49.9                              | -0.6                   | 48.8                              | 0.5                    |
| 1,3-di-Et-cyclohexane       | 48.4±1.1 <sup>c</sup>          | 49.9                              | -1.5                   | 48.8                              | -0.4                   |
| 1,4-di-Et-cyclohexane       | 50.7±1.1 <sup>c</sup>          | 49.9                              | 0.8                    | 48.8                              | 1.9                    |
| i-Bu-cyclohexane            | 47.6±0.2 [3]                   | 49.9                              | -2.3                   | 48.8                              | -1.2                   |
| n-Pr-cyclohexane            | 45.1±0.2 [3]                   | 45.2                              | -0.1                   | 45.3                              | -0.2                   |
| 1,3,5-tri-Me-cyclohexane    | 43.5±1.5 [Table S5]            | 45.2                              | -1.7                   | 41.9                              | 1.6                    |
| n-Bu-cyclohexane            | 49.4±0.2 [3]                   | 49.9                              | -0.5                   | 50.6                              | -1.2                   |
| n-Pe-cyclohexane            | 53.9±0.2 [3]                   | 54.6                              | -0.7                   | 55.8                              | -1.9                   |
| n-Hex-cyclohexane           | 59.0±0.5 [5]                   | 59.3                              | -0.3                   | 61.0                              | -2.0                   |
| n-Oct-cyclohexane           | 69.8±1.0 [6]                   | 68.7                              | 1.1                    | 71.5                              | -1.7                   |
| iPr-cyclohexane             | 44.0±0.2 [3]                   | 45.2                              | -1.2                   | 43.6                              | 0.4                    |
| trans-2-Me-iPr-cyclohexane  | 48.0±1.5 <sup>c</sup>          | 49.9                              | -1.9                   | 47.1                              | 0.9                    |
| cis-2-Me-iPr-cyclohexane    | 48.0±1.5 <sup>c</sup>          | 49.9                              | -1.9                   | 47.1                              | 0.9                    |
| trans-3-Me-iPr-cyclohexane  | 47.7±1.1 <sup>c</sup>          | 49.9                              | -2.2                   | 47.1                              | 0.6                    |
| cis-3-Me-iPr-cyclohexane    | 48.5±1.1 <sup>c</sup>          | 49.9                              | -1.4                   | 47.1                              | 1.4                    |
| trans-4-Me-iPr-cyclohexane  | 46.8±1.5 [Table S5]            | 49.9                              | -3.1                   | 47.1                              | -0.3                   |

|                              |                       |      |      |      |      |
|------------------------------|-----------------------|------|------|------|------|
| cis-4-Me-iPr-cyclohexane     | 48.3±1.5 <sup>c</sup> | 49.9 | -1.6 | 47.1 | 1.2  |
| 1,2-di-iPr-cyclohexane       | 54.9±1.5 <sup>c</sup> | 59.3 | -4.4 | 55.8 | -0.9 |
| 1,3-di-iPr-cyclohexane       | 54.9±1.5 <sup>c</sup> | 59.3 | -4.4 | 55.8 | -0.9 |
| 1,4-di-iPr-cyclohexane       | 54.9±1.5 <sup>c</sup> | 59.3 | -4.4 | 55.8 | -0.9 |
| 1,3,5-tri-iPr-cyclohexane    | 64.3±1.5 <sup>c</sup> | 73.4 | -9.1 | 68.0 | -3.7 |
| t-Bu-cyclohexane             | 47.0±0.2 [3]          | 46.5 | 0.5  | 46.2 | 0.8  |
| 2-Me-tBu-cyclohexane         | 50.5±1.5 <sup>c</sup> | 51.2 | -0.7 | 49.7 | 0.8  |
| 3-Me-t-Bu-cyclohexane        | 50.5±1.5 <sup>c</sup> | 51.2 | -0.7 | 49.7 | 0.8  |
| trans-4-Me-tBu-cyclohexane   | 51.3±1.1 <sup>c</sup> | 51.2 | 0.1  | 49.7 | 1.6  |
| cis-4-Me-tBu-cyclohexane     | 51.8±1.1 <sup>c</sup> | 51.2 | 0.6  | 49.7 | 2.1  |
| 1,2-di-tBu-cyclohexane       | 60.4±1.5 <sup>c</sup> | 61.9 | -1.5 | 61.0 | -0.6 |
| 1,3-di-tBu-cyclohexane       | 63.3±2.6 [Table S5]   | 61.9 | 1.4  | 61.0 | 2.3  |
| trans-1,4-di-tBu-cyclohexane | 61.3±1.5 <sup>c</sup> | 61.9 | -0.6 | 61.0 | 0.3  |
| cis-1,4-di-tBu-cyclohexane   | 61.8±1.5 <sup>c</sup> | 61.9 | -0.1 | 61.0 | 0.8  |
| 1,3,5-tri-tBu-cyclohexane    | 71.9±1.5 <sup>c</sup> | 77.3 | -5.4 | 75.8 | -3.9 |
| di-cyclohexyl-methane        | 64.5±3.5 [Table S5]   | 64.0 |      | 63.7 |      |
| mean absolute deviation      |                       |      | 1.6  |      | 1.1  |

<sup>a</sup> Calculated using equation  $\Delta_f^{\text{g}}H_m^{\text{o}}(298.15\text{ K}) = 4.69(nC - nC4) + 1.3nC4 + 3.0$  from [14].; <sup>b</sup> Calculated using equation  $\Delta_f^{\text{g}}H_m^{\text{o}}(298.15\text{ K}) = 5.65nC1 + 5.23nC2 + 3.08nC3 + 0.02nC4$ ; <sup>c</sup> Taken from Table 6.

**Table S8.** Correlation of the liquid-phase enthalpies of formation of alkyl-benzenes with the chain length (at  $T = 298.15\text{ K}$  in  $\text{kJ}\cdot\text{mol}^{-1}$ ).

| alkyl-benzene     | $N_C$ <sup>a</sup> | $\Delta_f H_m^{\text{o}}(\text{liq})_{\text{exp}}$ [4] | $\Delta_f H_m^{\text{o}}(\text{liq})_{\text{calc}}$ <sup>b</sup> | $\Delta$ <sup>c</sup> |
|-------------------|--------------------|--------------------------------------------------------|------------------------------------------------------------------|-----------------------|
| n-propyl-benzene  | 3                  | -38.3±0.8                                              | -37.9                                                            | -0.4                  |
| n-butyl-benzene   | 4                  | -63.2±1.1                                              | -63.6                                                            | 0.4                   |
| n-pentyl-benzene  | 5                  | -89.5±4.2                                              | -89.4                                                            | -0.1                  |
| n-hexyl-benzene   | 6                  |                                                        | -115.2                                                           |                       |
| n-heptyl-benzene  | 7                  |                                                        | -140.9                                                           |                       |
| n-octyl-benzene   | 8                  |                                                        | -166.7                                                           |                       |
| n-decyl-benzene   | 10                 | -218.3±2.3                                             | -218.2                                                           | -0.1                  |
| n-dodecyl-benzene | 12                 |                                                        | -269.7                                                           |                       |

<sup>a</sup> Number of C-atoms in the alkyl chain.; <sup>b</sup> Calculated using equation:  $\Delta_f H_m^{\text{o}}(\text{liq}, 298.15\text{ K}) / (\text{kJ}\cdot\text{mol}^{-1}) = -25.76 \times N_C + 39.4$  with ( $R^2 = 0.9999$ ) derived from data in this table. Uncertainties are estimated to account  $\pm 1.5\text{ kJ}\cdot\text{mol}^{-1}$ .; <sup>c</sup> Difference between column 3 and 4 in this table.

**Table S9.** Compilation of data on molar heat capacities  $C_{p,m}^{\text{o}}(\text{liq})$  and heat capacity differences  $\Delta_f^{\text{g}}C_{p,m}^{\text{o}}$  at  $T = 298.15\text{ K}$  (in  $\text{J}\cdot\text{K}^{-1}\cdot\text{mol}^{-1}$ )

| Compounds                                  | $C_{p,m}^{\text{o}}(\text{liq})$ <sup>a</sup> | $-\Delta_f^{\text{g}}C_{p,m}^{\text{o}}$ <sup>b</sup> |
|--------------------------------------------|-----------------------------------------------|-------------------------------------------------------|
| 1,3,5-tri-Me-cyclohexane                   | 244.2                                         | 74.1                                                  |
| 3-Me-ethyl-cyclohexane                     | 246.5                                         | 74.7                                                  |
| 4-Me-iso-propyl-cyclohexane                | 271.9                                         | 81.3                                                  |
| 1,3-di-tert-butyl-cyclohexane              | 382.2                                         | 110.0                                                 |
| dicyclohexyl-methane                       | 332.1                                         | 96.9                                                  |
| cyclohexane                                | 156.9 [15]                                    | 51.4                                                  |
| perhydro-dibenzyltoluene ( Marlotherm SH®) | 450.0 [16]                                    | 127.6                                                 |
| methyl oleate <sup>c</sup>                 | 585.4 [17]                                    | 108.5 [17]                                            |

<sup>a</sup> Calculated by the group-contribution procedure developed by Chickos *et al.* [18]. ; <sup>b</sup> Calculated according to the procedure developed by Acree and Chickos [19].; <sup>c</sup> Assumed to be equal to those of biodiesel fuels given in Table 8.

### Static method

The scheme of the experimental devise is shown in Fig. S1.

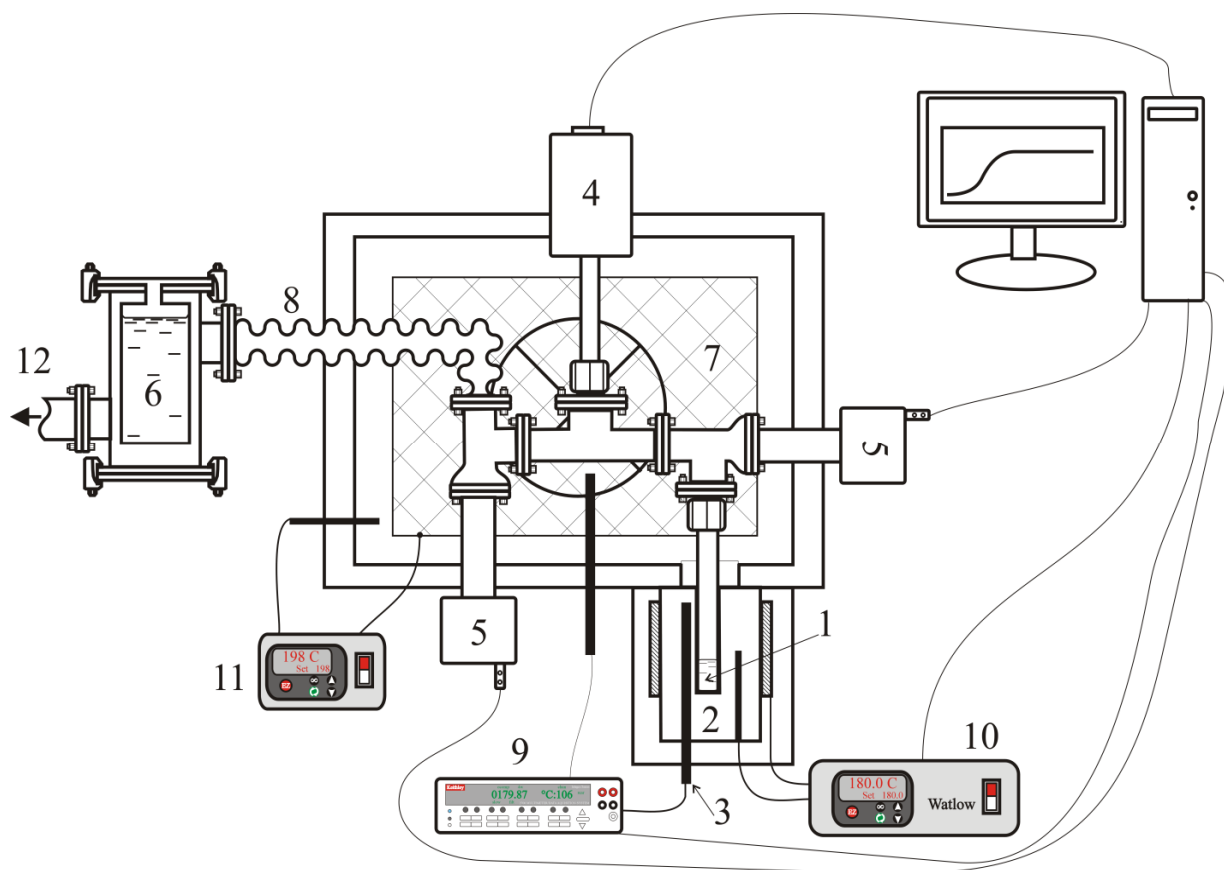

- |                                          |                                                   |
|------------------------------------------|---------------------------------------------------|
| 1- cell with the sample                  | 7- forced air convection oven                     |
| 2- aluminum thermostating block          | 8- bellows connection to the vacuum system        |
| 3- class A4 wire Pt100                   | 9- Keithley 2100 DMM                              |
| 4- pressure gauge MKS Baratron           | 10- Watlow PM6C1CA temperature controller         |
| 5- all-metal angle valves VAT series 571 | 11- rough temperature controller for the air oven |
| 6- liquid nitrogen cold trap             | 12- HS-2 diffusion pump                           |

**Figure S1.** The scheme of the static device for vapor pressure measurements of the low volatile compounds.

### Validation of the static device [20]

We measured the vapor pressure of the reference materials benzoic acid and naphthalene in order to check the reliability and uncertainty of the experimental apparatus and the data treatment procedure.

Benzoic acid has been recommended as a suitable reference compound for low vapor pressure measurements in the range (0.1 to 10) Pa over the solid sample [21,22]. In this work vapor pressures of benzoic acid were determined over the temperature range

(298 to 339) K and corresponding vapor pressures (0.1 to 8.8) Pa. We avoided the investigation of benzoic acid at higher temperatures because of a possible corrosive reaction of the gaseous benzoic acid with the material of the vacuum system and the pressure gauges.

Naphthalene is also used as a reference compound for testing devices in the vapor pressure range below 1000 Pa [21,23]. Vapor pressures (10 to 142) Pa over the crystalline naphthalene were determined in the temperature range (297 to 327) K. The extended studies of the reference compounds have revealed that our static apparatus has been able to provide reliable vapor pressures. To fit the temperature dependence of experimentally determined vapor pressures we used the well-established Clarke and Glew equation [24]:

$$R\ln(p_{\text{sat}}/p^{\circ}) = -\frac{\Delta_1^g G_m^{\circ}(\theta)}{\theta} + \Delta_1^g H_m^{\circ}(\theta) \left(\frac{1}{\theta} + \frac{1}{T}\right) + \Delta_1^g C_{p,m}^{\circ}(\theta) \left(\frac{\theta}{T} - 1 + \ln\left(\frac{T}{\theta}\right)\right) \quad (\text{S1}).$$

In Eq. S1  $p_{\text{sat}}$  is the vapor pressure of the samples, Pa;  $p^{\circ}=10^5$  Pa is the standard pressure;  $\theta$  is the reference temperature, K;  $\Delta_1^g G_m^{\circ}(\theta)$  is the change of the Gibbs energy during vaporisation (sublimation) of the sample at reference temperature, J·mol<sup>-1</sup>;  $\Delta_1^g H_m^{\circ}(\theta)$  is the enthalpy change during vaporisation (sublimation) of the sample at the reference temperature  $\theta$ , J·mol<sup>-1</sup>;  $\Delta_1^g C_{p,m}^{\circ}(\theta)$  is the heat capacity difference between gaseous and condensed phases, J·K<sup>-1</sup>·mol<sup>-1</sup>;  $T$  is the temperature of the experimental data, K.

Available vapor pressures of benzoic acid were collected and discussed by Sabbah *et al.* [21] and also very recently by Ribeiro da Silva *et al.* [25]. The data by Malaspina *et al.* [26], as well as by Davies and Jones [27] were excluded from approximation due to high systematic deviation (> 10 %) from the most reliable experimental data. Our experimental vapor pressures of benzoic acid agree well (within 3 %) with the reliable literature data. Such a good agreement of our experimental data is an evidence of the high reliability of our new apparatus for vapor pressure measurements in the range (0.1 to 10) Pa. Experimental enthalpies of sublimation for benzoic acid were also recently reviewed [21,25]. Sabbah *et al.* [21] recommended the enthalpy of sublimation  $\Delta_{\text{cr}}^g H_m^{\circ}$  (298.15 K) = (89.7 ± 1.0) kJ·mol<sup>-1</sup>. Later, the average value  $\Delta_{\text{cr}}^g H_m^{\circ}$ (298.15 K) = (90.2 ± 1.9) kJ·mol<sup>-1</sup>, was re-evaluated by Ribeiro da Silva *et al.* [28] from the data published in 22 original papers. In this work, the value  $\Delta_{\text{cr}}^g H_m^{\circ}$  (298.15 K) = (89.8 ± 0.1) kJ·mol<sup>-1</sup> was derived from the vapor pressure temperature dependence and this value is in excellent agreement with both recommendations.

Naphthalene is one of the most often studied reference compounds in the literature [29,30]. This compound is easy to get in a very pure quality and it has relatively high vapor pressure ~ 10 Pa at 298.15 K. Just recently, Růžička *et al.* [31] compiled and recommended a set of vapor pressures, used in this work for comparison. Our experimental pressures agree with the recommended values within 2 %. The sublimation enthalpy  $\Delta_{\text{cr}}^g H_m^{\circ}$ (298.15 K) = (72.70 ± 0.1) kJ·mol<sup>-1</sup> derived with this device is in excellent agreement with those recommended by Růžička *et al.* [31],  $\Delta_{\text{cr}}^g H_m^{\circ}$ (298.15 K) = 72.44 kJ·mol<sup>-1</sup>, and with the direct calorimetric value  $\Delta_{\text{cr}}^g H_m^{\circ}$ (298.15 K) = (72.6 ± 0.6) kJ·mol<sup>-1</sup> selected by the International Confederation for Thermal Analysis and Calorimetry (ICTAC)[21].

**Table S10.** The results of the absolute vapor pressure determination for biodiesel samples, measured using the static method.<sup>a</sup>

| $T/$<br>K <sup>b</sup>                                                                                                           | $p_i/$<br>Pa | $u(p_i)/$<br>Pa <sup>c</sup> | $\Delta_1^g H_m^{\circ}(T)/^d$<br>kJ·mol <sup>-1</sup> | $\Delta_1^g S_m^{\circ}(T)/$<br>J·K <sup>-1</sup> ·mol <sup>-1</sup> |
|----------------------------------------------------------------------------------------------------------------------------------|--------------|------------------------------|--------------------------------------------------------|----------------------------------------------------------------------|
| (Raps-Methyl-Ester) RME: $\Delta_1^g H_m^{\circ}$ (298.15 K) = (99.8±3.5) kJ·mol <sup>-1</sup>                                   |              |                              |                                                        |                                                                      |
| $\ln(p/p_{\text{ref}}) = \frac{391.0}{R} - \frac{132177.7}{RT} - \frac{108.5}{R} \ln \frac{T}{298.15}$ ; $p_{\text{ref}} = 1$ Pa |              |                              |                                                        |                                                                      |
| 412.8                                                                                                                            | 79.8         | 2.45                         | 87.4                                                   | 152.4                                                                |
| 417.8                                                                                                                            | 107.3        | 2.49                         | 86.8                                                   | 151.0                                                                |
| 422.7                                                                                                                            | 139.3        | -0.62                        | 86.3                                                   | 149.5                                                                |
| 427.7                                                                                                                            | 180.1        | -6.19                        | 85.8                                                   | 148.0                                                                |



---

|       |       |        |      |       |
|-------|-------|--------|------|-------|
| 432.6 | 235.2 | -9.40  | 85.2 | 146.7 |
| 437.6 | 308.0 | -12.40 | 84.7 | 145.5 |
| 442.5 | 406.3 | -7.98  | 84.2 | 144.4 |
| 447.5 | 580.0 | 45.51  | 83.6 | 144.1 |

(Soy-Methyl-Ester) SME:  $\Delta_1^g H_m^o(298.15 \text{ K}) = (85.1 \pm 4.3) \text{ kJ} \cdot \text{mol}^{-1}$

$$\ln(p/p_{ref}) = \frac{357.7}{R} - \frac{117471.9}{RT} - \frac{108.5}{R} \ln \frac{T}{298.15} ; p_{ref} = 1 \text{ Pa}$$

|       |       |       |       |       |
|-------|-------|-------|-------|-------|
| 404.1 | 62.0  | 1.93  | 73.63 | 120.8 |
| 409.0 | 79.0  | 0.97  | 73.10 | 119.3 |
| 413.9 | 96.7  | -3.85 | 72.56 | 117.6 |
| 418.8 | 122.7 | -5.87 | 72.03 | 116.3 |
| 423.6 | 167.0 | 4.61  | 71.51 | 115.6 |
| 428.6 | 200.9 | -4.71 | 70.97 | 113.9 |
| 423.7 | 163.5 | 0.33  | 71.50 | 115.4 |
| 428.6 | 205.8 | 0.19  | 70.97 | 114.1 |
| 433.5 | 266.2 | 8.90  | 70.44 | 113.2 |

biodiesel reference sample JRC:  $\Delta_1^g H_m^o(298.15 \text{ K}) = (71.4 \pm 3.0) \text{ kJ} \cdot \text{mol}^{-1}$

$$\ln(p/p_{ref}) = \frac{327.4}{R} - \frac{103702.2}{RT} - \frac{108.5}{R} \ln \frac{T}{298.15} ; p_{ref} = 1 \text{ Pa}$$

|       |       |       |       |      |
|-------|-------|-------|-------|------|
| 403.2 | 92.3  | 1.92  | 59.96 | 90.6 |
| 408.2 | 111.3 | -0.83 | 59.42 | 89.0 |
| 413.1 | 136.2 | -2.15 | 58.88 | 87.7 |
| 418.1 | 167.9 | -1.62 | 58.34 | 86.4 |
| 423.1 | 206.0 | -0.44 | 57.80 | 85.2 |
| 428.1 | 250.7 | 1.01  | 57.26 | 84.0 |
| 433.0 | 302.9 | 2.95  | 56.72 | 82.8 |

---

<sup>a</sup> Reference samples from Joint Research Center of Institute for Reference Materials and Measurements (<https://www.confidence.eu/>) measured for the EU Project “Metrology of biofuels” ENG-09 REG01 project.; <sup>b</sup> Saturation temperature measured with the standard uncertainty ( $u(T) = 0.01 \text{ K}$ ); <sup>c</sup> Standard uncertainties were calculated with  $u(p/\text{Pa}) = 0.025 + 0.025(p/\text{Pa})$ .; <sup>d</sup> Uncertainty of the vapourisation enthalpy  $U(\Delta_1^g H_m^o)$  is the expanded uncertainty (0.95 level of confidence). Uncertainties include uncertainties from the fitting equation and uncertainties from adjustment of vaporisation enthalpies to the reference temperature  $T = 298.15 \text{ K}$ . Uncertainties in the temperature adjustment of vaporisation enthalpies to the reference temperature  $T = 298.15 \text{ K}$  are estimated to account with 20% to the total adjustment.

The experimental vapor pressures  $p_i$  measured in this work were fitted with the following equation [32]:

$$R \times \ln(p_i / p_{ref}) = a + \frac{b}{T} + \Delta_1^g C_{p,m}^o \times \ln\left(\frac{T}{T_0}\right) \quad (S2),$$

where  $R = 8.31446 \text{ J} \cdot \text{K}^{-1} \cdot \text{mol}^{-1}$  is the molar gas constant, the reference pressure  $p_{ref} = 1 \text{ Pa}$ ,  $a$  and  $b$  are adjustable parameters, the arbitrary temperature  $T_0$  applied in Eq. (S2) was chosen to be  $T_0 = 298.15 \text{ K}$  and  $\Delta_1^g C_{p,m}^o$  is the difference of the molar heat capacities of the gas and the liquid phases respectively (see Table S9). Experimental vapor pressures measured in this work, have been used to obtain the enthalpies of vaporisation using the following equation:

$$\Delta_1^g H_m^o(T) = -b + \Delta_1^g C_{p,m}^o \times T \quad (S3)$$

Experimental vapor pressures temperature dependences were also used to derive the vaporisation entropies at temperatures  $T$  by using the following equation:

$$\Delta_1^g S_m^o(T) = \Delta_1^g H_m^o(T) / T + R \times \ln(p_i / p^o) \quad (S4)$$

with  $p^o = 0.1 \text{ MPa}$ . Coefficients  $a$  and  $b$  of Eq. (S2),  $\Delta_1^g H_m^o(T)$  and  $\Delta_1^g S_m^o(T)$  values are given in Table S10. The combined uncertainties of the vaporization enthalpies include uncertainties from the fitting equation and uncertainties from adjustment of vaporisation enthalpies to the reference temperature  $T=298.15 \text{ K}$ .

## References

1. Ducros, M.; Gruson, J.F.; Sannier, H. Estimation Des Enthalpies de Vaporisation Des Composes Organiques Liquides. Partie 1. Applications Aux Alcanes, Cycloalcanes, Alcenes, Hydrocarbures Benzeniques, Alcools, Alcanes Thiols, Chloro et Bromoalcanes, Nitriles, Esters, Acides et Aldehydes. *Thermochim. Acta* **1980**, *36*, 39–65, doi:10.1016/0040-6031(80)80109-2.
2. Schleyer, P.R.; Williams, J.E.; Blanchard, K.R. The Evaluation of Strain in Hydrocarbons. *J. Am. Chem. Soc.* **1970**, *92*, 2377–2386.
3. Majer, V.; Svoboda, V. *Enthalpies of Vaporization of Organic Compounds: A Critical Review and Data Compilation*, Blackwell Scientific Publications, Oxford; 1985;
4. Pedley, J.B.; Naylor, R.D.; Kirby, S.P. *Thermochemical Data of Organic Compounds*, Chapman and Hall, New York. **1986**, 1–792.
5. Fuchs, R.; Peacock, L.A. Heats of Vaporization of Monoalkylcyclohexanes by the Gas Chromatography – Calorimetry Method. *Can. J. Chem.* **1978**, *56*, 2493–2498, doi:10.1139/v78-408.
6. Reid, R.C. Handbook on Vapor Pressure and Heats of Vaporization of Hydrocarbons and Related Compounds, R. C. Wilhort and B. J. Zwolinski, Texas A&M Research Foundation. College Station, Texas(1971). 329 Pages.\$10.00. *AIChE J.* **1972**, *18*, 1278–1278, doi:10.1002/aic.690180637.
7. Antheaume, J.; Guiochon, G. Application de La Chromatographie En Phase Gazeuse à l'étude de La Composition Des Fractions Moyennes d'un Brut Pétrolier. *Bull. Soc. Chim. Fr.* **1965**, *2*, 298–307.
8. Rang, S.; Orav, A.; Kunigas, K.; Eisen, O. Capillary Gas Chromatography of Monosubstituted Cyclopentenenes and Cyclohexenes. *Chromatographia* **1977**, *10*, 115–122, doi:10.1007/BF02297862.
9. Beens, J.; Tijssen, R.; Blomberg, J. Prediction of Comprehensive Two-Dimensional Gas Chromatographic Separations. *J. Chromatogr. A* **1998**, *822*, 233–251, doi:10.1016/S0021-9673(98)00649-9.
10. SciFinder - Chemical Abstracts Service Available Online: [Http://Scifinder.Cas.Org/](http://Scifinder.Cas.Org/) (Accessed on 05.12.2022).
11. NIST Chemistry WebBook. Available Online: [Https://Webbook.Nist.Gov/Chemistry/](https://Webbook.Nist.Gov/Chemistry/) (Accessed on 05.12.2022).
12. Stephenson, R.M.; Malanowski, S. *Handbook of the Thermodynamics of Organic Compounds*; Springer Netherlands: Dordrecht, 1987; ISBN 978-94-010-7923-5.
13. Osborn, A.G.; Douslin, D.R. Vapor-Pressure Relations for 15 Hydrocarbons. *J. Chem. Eng. Data* **1974**, *19*, 114–117, doi:10.1021/je60061a022.

- 
14. Chickos, J.S.; Hesse, D.G.; Hosseini, S.; Liebman, J.F.; David Mendenhall, G.; Verevkin, S.P.; Rakus, K.; Beckhaus, H.-D.; Rüchardt, C. Enthalpies of Vaporization of Some Highly Branched Hydrocarbons. *J. Chem. Thermodyn.* **1995**, *27*, 693–705, doi:10.1006/jcht.1995.0071.
  15. Lainez, A.; Rodrigo, M.M.; Wilhelm, E.; Grolier, J.P.E. Excess Volumes and Excess Heat Capacities of Some Mixtures with Trans,Trans,Cis-1,5,9-Cyclododecatriene at 298.15 K. *J. Chem. Eng. Data* **1989**, *34*, 332–335, doi:10.1021/jc00057a021.
  16. Müller, K.; Stark, K.; Emelyanenko, V.N.; Varfolomeev, M.A.; Zaitsau, D.H.; Shoifet, E.; Schick, C.; Verevkin, S.P.; Arlt, W. Liquid Organic Hydrogen Carriers: Thermophysical and Thermochemical Studies of Benzyl- and Dibenzyl-Toluene Derivatives. *Ind. Eng. Chem. Res.* **2015**, *54*, 7967–7976, doi:10.1021/acs.iecr.5b01840.
  17. Zaitsau, D.H.; Verevkin, S.P. Vapor Pressure of Pure Methyl Oleate—the Main Component of Biodiesel. *Russ. J. Gen. Chem.* **2021**, *91*, 2061–2068, doi:10.1134/S1070363221100236.
  18. Chickos, J.S.; Hosseini, S.; Hesse, D.G.; Liebman, J.F. Heat Capacity Corrections to a Standard State: A Comparison of New and Some Literature Methods for Organic Liquids and Solids. *Struct. Chem.* **1993**, *4*, 271–278, doi:10.1007/BF00673701.
  19. Acree, W.; Chickos, J.S. Phase Transition Enthalpy Measurements of Organic and Organometallic Compounds. Sublimation, Vaporization and Fusion Enthalpies From 1880 to 2015. Part 1. C 1 – C 10. *J. Phys. Chem. Ref. Data* **2016**, *45*, 033101, doi:10.1063/1.4948363.
  20. Zaitsau, D.H.; Verevkin, S.P.; Sazonova, A.Y. Vapor Pressures and Vaporization Enthalpies of 5-Nonanone, Linalool and 6-Methyl-5-Hepten-2-One. Data Evaluation. *Fluid Phase Equilib.* **2015**, *386*, 140–148, doi:10.1016/j.fluid.2014.11.026.
  21. Sabbah, R.; Xu-Wu, A.; Chickos, J.S.; Leitão, M.L.P.; Roux, M. V.; Torres, L.A. Reference Materials for Calorimetry and Differential Thermal Analysis. *Thermochim. Acta* **1999**, *331*, 93–204, doi:10.1016/s0040-6031(99)00009-x.
  22. Ambrose, D.; Lawrenson, I.J.; Angus, S.; Paule, R.C. *Recommended Reference Materials for Realization of Physicochemical Properties*; Herington, E.F.G., Ed.; Elsevier, 1977; ISBN 978-0-08-022340-7.
  23. Marsh, K.N. *Recommended Reference Materials for the Realization of Physicochemical Properties*; Blackwell Scientific Publications: Oxford [Oxfordshire]; Boston, 1987; ISBN 063201718X 9780632017188.
  24. Clarke, E.C.W.; Glew, D.N. Evaluation of Thermodynamic Functions from Equilibrium Constants. *Trans. Faraday Soc.* **1966**, *62*, 539, doi:10.1039/tf9666200539.
  25. Ribeiro da Silva, M.A. V.; Monte, M.J.S.; Santos, L.M.N.B.F. The Design, Construction, and Testing of a New Knudsen Effusion Apparatus. *J. Chem. Thermodyn.* **2006**, *38*, 778–787, doi:10.1016/j.jct.2005.08.013.
  26. Malaspina, L.; Gigli, R.; Bardi, G. Microcalorimetric Determination of the Enthalpy of Sublimation of Benzoic Acid and Anthracene. *J. Chem. Phys.* **1973**, *59*, 387–394, doi:10.1063/1.1679817.
  27. Davies, M.; Jones, J.I. The Sublimation Pressures and Heats of Sublimation of Some Carboxylic Acids. *Trans. Faraday Soc.* **1954**, *50*, 1042–1047, doi:10.1039/TF9545001042.
  28. Ribeiro Da Silva, M.A.V.; Cabral, J.I.T.A.; Gomes, P.; Gomes, J.R.B. Combined Experimental and Computational Study of the Thermochemistry of Methylpiperidines. *J. Org. Chem.* **2006**, *71*, 3677–3685, doi:10.1021/jo052468w.
  29. Site, A.D. The Vapor Pressure of Environmentally Significant Organic Chemicals: A Review of Methods and Data at Ambient Temperature. *J. Phys. Chem. Ref. Data* **1997**, *26*, 157–193, doi:10.1063/1.556006.
  30. Shiu, W.-Y.; Ma, K.-C. Temperature Dependence of Physico-Chemical Properties of Selected Chemicals of Environmental Interest. I. Mononuclear and Polynuclear Aromatic Hydrocarbons. *J. Phys. Chem. Ref. Data* **2000**, *29*, 41–130, doi:10.1063/1.556055.
  31. Růžička, K.; Fulem, M.; Růžička, V. Recommended Vapor Pressure of Solid Naphthalene. *J. Chem. Eng. Data* **2005**, *50*, 1956–1970, doi:10.1021/jc050216m.
  32. Kulikov, D.; Verevkin, S.P.; Heintz, A. Enthalpies of Vaporization of a Series of Aliphatic Alcohols. *Fluid Phase Equilib.* **2001**, *192*, 187–207, doi:10.1016/S0378-3812(01)00633-1.
